# Supplementary material for: Synthesis of FeP2/C nanohybrids and their performance for hydrogen evolution reaction
Source: Royal Society of Chemistry journal article supplement (doi:10.1039/c4ta04758c), 2014-11-10
Supplement: c4ta04758c1.pdf [file c4ta04758c1.pdf]

## Electronic Supplementary Information (ESI)

# Synthesis of FeP<sub>2</sub>/C nanohybrids and their performance for hydrogen evolution reaction

Jun Jiang,<sup>a,b,c,d</sup> Chunde Wang,<sup>a,b,c,d</sup> Jiajia Zhang,<sup>a,e</sup> Wenliang Wang,<sup>a,b,c,d</sup> Xiaoli Zhou,<sup>a,b,c,d</sup> Bicao Pan,<sup>a,e</sup> Kaibin Tang,<sup>a,b</sup> Jian Zuo,<sup>a</sup> Qing Yang\*,<sup>a,b,c,d</sup>

<sup>a</sup> Hefei National Laboratory of Physical Sciences at the Microscale, University of Science and Technology of China (USTC), Hefei 230026, Anhui, P. R. China.

<sup>b</sup> Department of Chemistry, USTC, Hefei 230026, Anhui, P. R. China.

<sup>c</sup> Laboratory of Nanomaterials for Energy Conversion, USTC, Hefei 230026, Anhui, P. R. China.

<sup>d</sup> Synergetic Innovation Center of Quantum Information & Quantum Physics, USTC, Hefei 230026, Anhui, P. R. China.

<sup>e</sup> Department of Physics, USTC, Hefei 230026, Anhui, P. R. China.

\* Corresponding author. E-mail: [qyoung@ustc.edu.cn](mailto:qyoung@ustc.edu.cn); Fax: +86-551-63606266; Tel: +86-551-63600243.

## 1. Experimental

**Materials.** Ferrocene ( $\text{Fe}(\text{C}_5\text{H}_5)_2 \geq 95\%$ ) is purchased from Alfa Aesar. Red phosphorus (powder, 99% purity), selenium powder (99% purity) and solvent of ethanol are all obtained from Shanghai Chemical Reagents Company, China. All reagents are used as received without further purification.

**Synthesis of  $\text{FeP}_2/\text{C}$  nanohybrids.** Synthetic procedures to the  $\text{FeP}_2/\text{C}$  nanohybrids are adopted from our previous work<sup>S1</sup> performed in an evacuated and sealed quartz tube with variations of precursors and reaction temperatures, and the details are described as below. In a typical synthesis, a mixture of 0.112 g (~0.6 mmol) of  $\text{Fe}(\text{C}_5\text{H}_5)_2$  and 0.038 g (~1.2 mmol) of red phosphorus is tableted and put into a quartz tube ( $\varnothing 8 \text{ mm} \times 150 \text{ mm}$ ), which is then evacuated and sealed. The tube is loaded into a resistance furnace horizontally, heated from room temperature to 500 °C at a rate of 2 °C  $\text{min}^{-1}$ , and kept at this reaction temperature for 30 h. After reaction the tube is naturally cooled to room temperature, black products are collected, washed with absolute alcohol several times, and finally dried in a vacuum furnace at 60 °C for further investigation.

**Structure Characterization.** The purity and phases of the products are identified by X-ray diffraction (XRD) patterns on a Philips X'Pert Pro Super diffractometer with graphite-monochromatized Cu-K $\alpha$  radiation ( $\lambda = 1.54178 \text{ \AA}$ ). The morphologies of the product are examined by field emission scanning electron microscope (SEM, JEOL JSM-6700F). The high resolution TEM (HRTEM), selected area electron diffraction (SAED) patterns, high-angle annular dark-field scanning transmission electron microscope (HAADF-STEM) and corresponding energy-dispersive X-ray spectroscopy (EDX) mapping analyses are performed on a JEOL JEM-ARF200F TEM/STEM with a spherical aberration corrector. Raman spectrum is carried out on a JY LABRAM-HR confocal laser micro-Raman spectrometer using  $\text{Ar}^+$  laser excitation with a wavelength of 514.5 nm. The weight percentage of carbon and hydrogen are characterized by elemental analysis (EA, Elemental vario EL cube, Thermal Conductivity Detector) at pure oxygen atmosphere. The surface structures of the samples are determined by attenuated total reflection Fourier transformed infrared (ATR-FTIR) spectroscopy (Prestige-21, SHIMADZU). X-ray photoelectron spectra (XPS) are acquired on an ESCALAB MK II with Mg K $\alpha$  as the excitation source. The BET (Brunauer–Emmett–Teller) surface area and BJH (Barrett–Joyner–Halenda) porous distribution plots are measured on a Micromeritics ASAP 2020 accelerated surface area and porosimetry system.

**Electrochemical Characterization.** All the electrochemical measurements are conducted in a typical three-electrode setup with an electrolyte solution of 0.50 M  $\text{H}_2\text{SO}_4$ , a Ag/AgCl (in saturated KCl solution) electrode as the reference electrode, a graphite rod as the counter electrode. The preparation of working electrodes is

described as below. Typically, 6 mg of catalyst and 40  $\mu\text{L}$  of Nafion solution (Sigma Aldrich, 5 wt%) are dispersed in 1 mL water-ethanol solution with volume ratio of 4:1 by sonicating for several hours to form a homogeneous ink. Then 5  $\mu\text{L}$  of the catalyst ink (containing 30  $\mu\text{g}$  of catalyst) is loaded onto a glassy carbon electrode of 3 mm in diameter (loading  $\sim 0.425 \text{ mg cm}^{-2}$ ). Finally, the as-prepared working electrode is dried at room temperature. The working electrodes of bulk  $\text{FeP}_2$  and Pt/C (20 wt.%) with the same mass loading are also prepared. All of the potentials in our manuscript are calibrated to a reversible hydrogen electrode (RHE) based on the Nernst equation. Polarization curves are obtained by linear sweep voltammetry with a scan rate of  $5 \text{ mV s}^{-1}$  while rapidly stirring the solution with a magnetic stir bar and continually bubbling the electrolyte solution with high purity hydrogen. Cyclic voltammetry (CV) is conducted between  $-0.2$  and  $0.2 \text{ V}$  vs RHE at a scan rate of  $100 \text{ mV s}^{-1}$ . The electrochemistry impedance spectrum (EIS) is measured in an electrochemical workstation (CHI660E) with the frequency from 100 KHz to 0.01 Hz at an overpotential of 200 mV.

## 2. Nitrogen adsorption-desorption isotherms of the $\text{FeP}_2/\text{C}$ nanohybrids

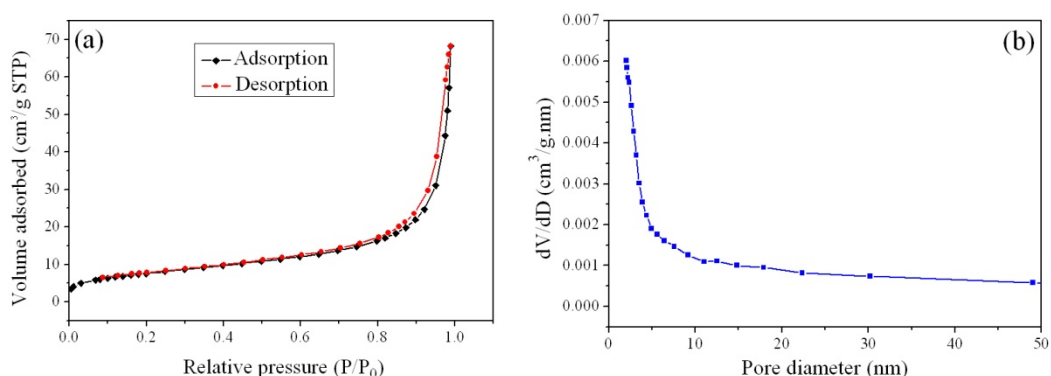

**Fig. S1.** Nitrogen sorption isotherms and the corresponding pore size distribution curve of the  $\text{FeP}_2/\text{C}$  nanohybrids. The BET surface area, mean pore size, and pore volume derived from the adsorption branch are  $27.7 \text{ m}^2 \text{ g}^{-1}$ ,  $15.7 \text{ nm}$ , and  $0.1 \text{ cm}^3 \text{ g}^{-1}$ , respectively.

## 3. EDX spectra of the $\text{FeP}_2/\text{C}$ nanohybrids

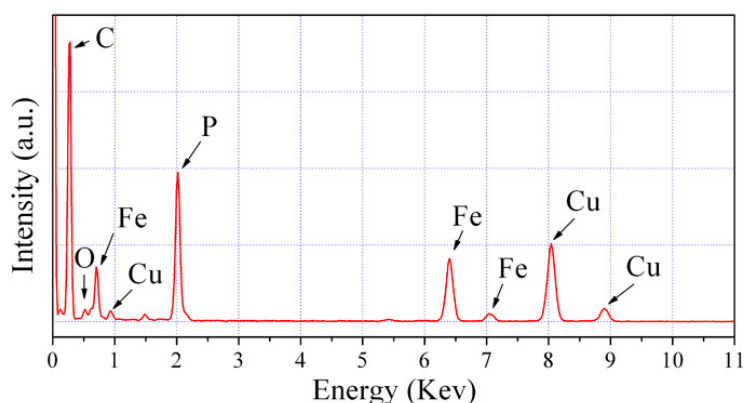

**Fig. S2.** EDX spectra of the  $\text{FeP}_2/\text{C}$  nanohybrids. The signal of Cu arises from the

TEM grid.

#### 4. Synthesis of bulk FeP<sub>2</sub> with their XRD pattern and SEM images

**Synthesis of bulk FeP<sub>2</sub>.** Synthetic procedures to the bulk FeP<sub>2</sub> are adopted from previous work.<sup>S2</sup> In a typical synthesis, Fe powder (1 mmol, 0.056g) and red phosphorus (2 mmol, 0.062g) are tableted and put into a quartz tube ( $\varphi$ 8mm  $\times$  150 mm), which is then evacuated and sealed. The tube is loaded into a resistance furnace horizontally, heated from room temperature to 700 °C at a rate of 2 °C/min, and kept at this reaction temperature for 5 day. After that, they are cooled to room temperature via quenching in water and then the black products are collected for further characterizations.

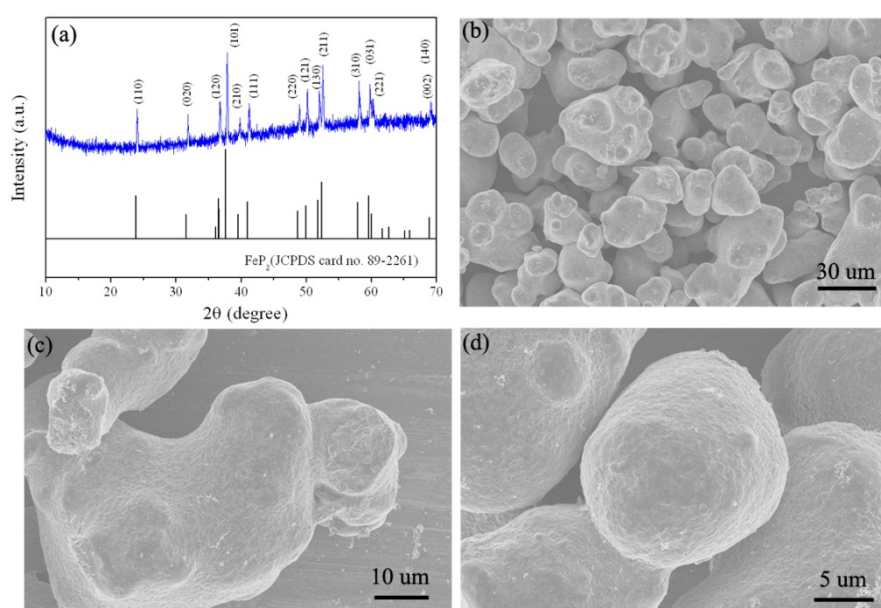

**Fig. S3.** (a) Powder XRD pattern for the bulk FeP<sub>2</sub> (blue, top) and the standard pattern of FeP<sub>2</sub> (JCPDS card no. 89-2261) (black, bottom), (b) low-magnified, (c) and (d) high-magnified SEM images for the as-prepared bulk FeP<sub>2</sub>.

#### 5. Calculation of the relative surface areas between bulk FeP<sub>2</sub> and FeP<sub>2</sub>/C nanohybrids

According to the report,<sup>S3</sup> the double layer capacitance ( $C_{dl}$ ) of the electrocatalysts are expected to be linearly proportional to their effective active surface area, which can be measured by cyclic voltammetry (CV) method. However, since the carbon tubes in our hybrids would contribute to the capacitance, we carry out the CV measurements to roughly estimate the relative surface areas between bulk FeP<sub>2</sub> and FeP<sub>2</sub>/C nanohybrids. CV measurements are taking in the region of 0.1-0.3 V vs. RHE and the double-layer capacitance is estimated by plotting the  $\Delta J$  ( $J_a - J_c$ ) at 0.2 V vs. RHE against the scan rate, where the slope is twice  $C_{dl}$ .

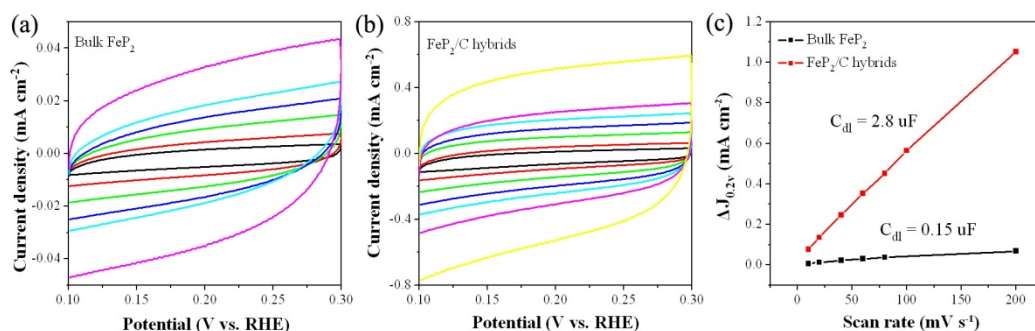

**Fig. S4.** Cyclic voltammograms in the region of 0.1–0.3 V vs. RHE for (a) the bulk FeP<sub>2</sub> and (b) the FeP<sub>2</sub>/C nanohybrids, and (c) the differences in current density ( $\Delta J = J_a - J_c$ ) at 0.2 V vs. RHE plotted against scan rate fitted to a linear regression allows for the estimation of  $C_{dl}$ . The current density in the figures is based on the geometric surface areas of the glassy carbon electrodes.

## 6. Calculation of the electroactive surface area of Pt/C electrode

The electroactive surface area of Pt/C electrode is evaluated by measuring the charge collected in the H adsorption/desorption region after double-layer correction and assuming a value of 220 mC cm<sup>-2</sup> for the adsorption of a hydrogen monolayer,<sup>S4</sup> and according to the following equation:  $S = Q_H/Q_S$ , the electroactive surface area of the Pt/C electrode can be determined to be 4.30 cm<sup>2</sup>, and the real roughness factor of the Pt/C electrode is 60.9.

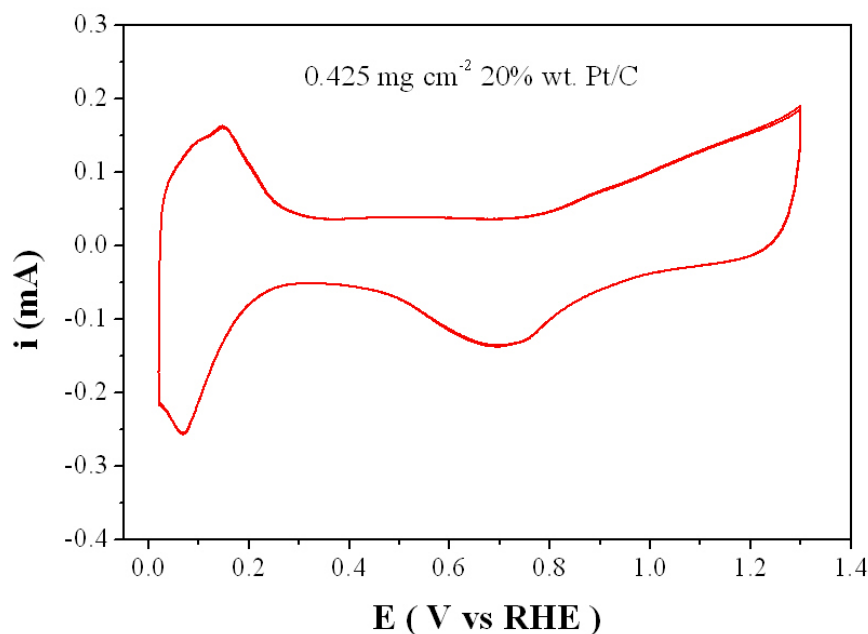

**Fig. S5.** CV of the Pt/C electrode (20% wt.) with catalysts loading of 0.425 mg cm<sup>-2</sup> measured in 0.50 M H<sub>2</sub>SO<sub>4</sub> aqueous solution and the scan rate = 20 mV s<sup>-1</sup>. The electroactive surface area is determined from the characteristic peak in the negative region (from 0.05 to 0.40 V vs. RHE) attributable to atomic hydrogen

adsorption on the Pt particles surfaces.

## 7. Density functional theory (DFT) calculations on the Gibbs free energies for hydrogen adsorption on FeP<sub>2</sub> (120) facet with P terminated surface

All the calculations are performed using density-functional theory (DFT) method as implemented in a Vienna *ab initio* simulation package (VASP)<sup>S5-S7</sup> by using generalized gradient approximation Perdew-Burke-Eznerhof (GGA-PBE) method.<sup>S8</sup> Projector augmented wave method (PAW)<sup>S9,S10</sup> is used to describe the interaction between the atomic cores and the electrons. The (1 × 1) surface of FeP<sub>2</sub> (120) is chosen for the consideration of the dominating planes based on experimental observation, which is simulated by using a four-atom-layer-thick slab. In our calculations, the Brillouin zone of the slab is sampled by the 10 × 2 × 1 Monkhorst-Pack k-points. As the P-terminated surface is identified as the active sites for adsorption/desorption of H in the case of MoP system,<sup>S11</sup> we only consider the P terminated surface of the FeP<sub>2</sub> for the calculation in the current work.

### Adsorption of H atom(s) on FeP<sub>2</sub> (120) surface

The differential adsorption energy of H adsorption is chosen to describe the stability of hydrogen according to the literature,<sup>S12</sup> which is given below:

$$\Delta E_H = E(\text{FeP}_2 + n\text{H}) - E(\text{FeP}_2 + (n-1)\text{H}) - 1/2 E(\text{H}_2), \quad (1)$$

where  $E(\text{FeP}_2 + n\text{H})$  is the total energy of FeP<sub>2</sub> with the n hydrogen atoms adsorbed on surface,  $E(\text{FeP}_2 + (n-1)\text{H})$  is the total energy of FeP<sub>2</sub> with (n-1) hydrogen atoms adsorbed on surface and  $E(\text{H}_2)$  is the total energy of hydrogen molecule in gas phase. Since top surface in our model has four P atoms, adsorption of one, two, three or four H atoms just corresponds to the H coverage of 25%, 50%, 75% or 100% on the surface.

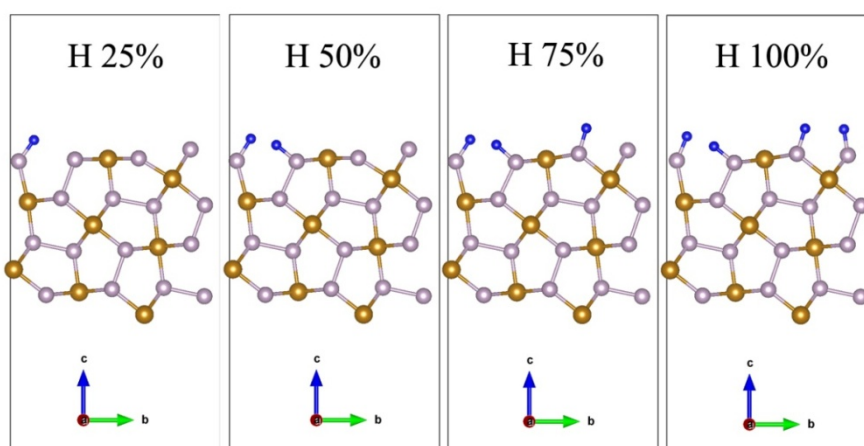

**Fig. S6.** H adsorbed FeP<sub>2</sub> (120) with P terminated surfaces. (Fe—brown sphere, P—purple sphere, H—blue sphere).

## Catalytic activity of FeP<sub>2</sub>

To evaluate the catalytic activity of FeP<sub>2</sub>, we calculate the Gibbs free energy of hydrogen adsorption as below:

$$\Delta G_{\text{H}}^{\circ} = \Delta E_{\text{H}} + \Delta E_{\text{ZPE}} - T \Delta S_{\text{H}} \quad (2)$$

where  $\Delta E_{\text{ZPE}}$  is the difference in zero point energy between the adsorbed state and the gas phase,  $\Delta S_{\text{H}}$  is the entropy difference between the adsorbed state and the gas phase. The gas phase entropy of H is taken from ref. S13. The calculated  $\Delta G_{\text{H}}^{\circ}$  values for H adsorption on FeP<sub>2</sub>(120) with P terminated surface are listed in Table S2. It will be a good catalyst for hydrogen evolution if the free energy of adsorbed H is close to that of the reactant or product (*i.e.*,  $\Delta G_{\text{H}}^{\circ} \approx 0$ ). From the DFT results, we can obtain that all of the exposed P atoms on the FeP<sub>2</sub>(120) surface are effective sites for HER, which is responsible for the excellent catalytic activity of FeP<sub>2</sub> in the experiments.

**Table S1.** Calculated binding energy and Gibbs free energy of H adsorption on FeP<sub>2</sub>(120) with P terminated surface.

| H Coverage | $\Delta E_{\text{H}}$ (eV) | $\Delta G_{\text{H}}^{\circ}$ (eV) |
|------------|----------------------------|------------------------------------|
| 25%        | -0.286                     | -0.03                              |
| 50%        | -0.195                     | 0.06                               |
| 75%        | -0.336                     | -0.08                              |
| 100%       | -0.206                     | 0.05                               |

## 8. The cycling stability of the FeP<sub>2</sub>/C nanohybrids in 0.50 M H<sub>2</sub>SO<sub>4</sub>

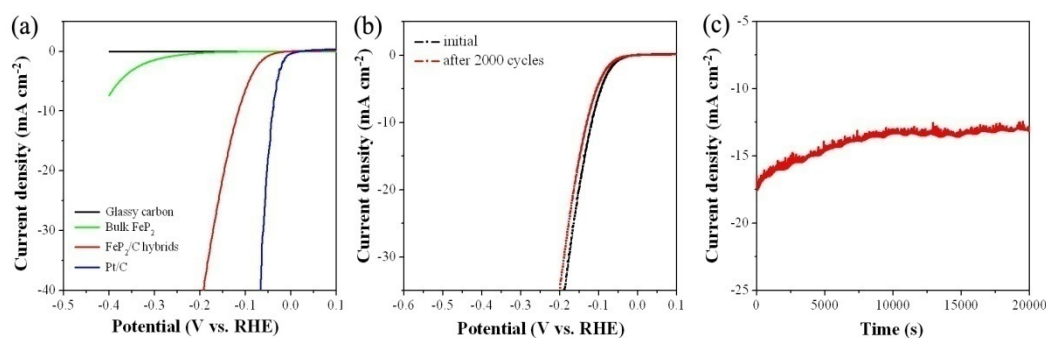

**Fig. S7.** (a) Polarization curves of the FeP<sub>2</sub>/C nanohybrids, bulk FeP<sub>2</sub>, bare glassy carbon and Pt/C electrode in 0.50 M H<sub>2</sub>SO<sub>4</sub> with a scan rate of 5 mV s<sup>-1</sup>, (b) polarization curves of the FeP<sub>2</sub>/C nanohybrids initially and after 2000 CV scans between +0.2 and -0.2 V vs. RHE, and (c) time-dependent current density curve for the FeP<sub>2</sub>/C nanohybrids under static overpotential of 150 mV for 20000 s. The current density in the figures is based on the geometric surface areas of the glassy carbon electrodes.

## 9. Synthesis of FeSe<sub>2</sub>/C hybrids with XRD pattern, SEM and TEM images



**Synthesis of FeSe<sub>2</sub>/C hybrids.** Fe(C<sub>5</sub>H<sub>5</sub>)<sub>2</sub> (0.4 mmol, 0.0744g) and Se powder (0.8 mmol, 0.0632g) are tableted and put into a quartz tube (φ8 mm × 150 mm), which is then evacuated and sealed. Then, the tube is loaded into a resistance furnace horizontally, heated from room temperature to 600 °C at a rate of 2 °C /min, and kept at this reaction temperature for 20 h. After the tube is naturally cooled to room temperature, the products are collected.

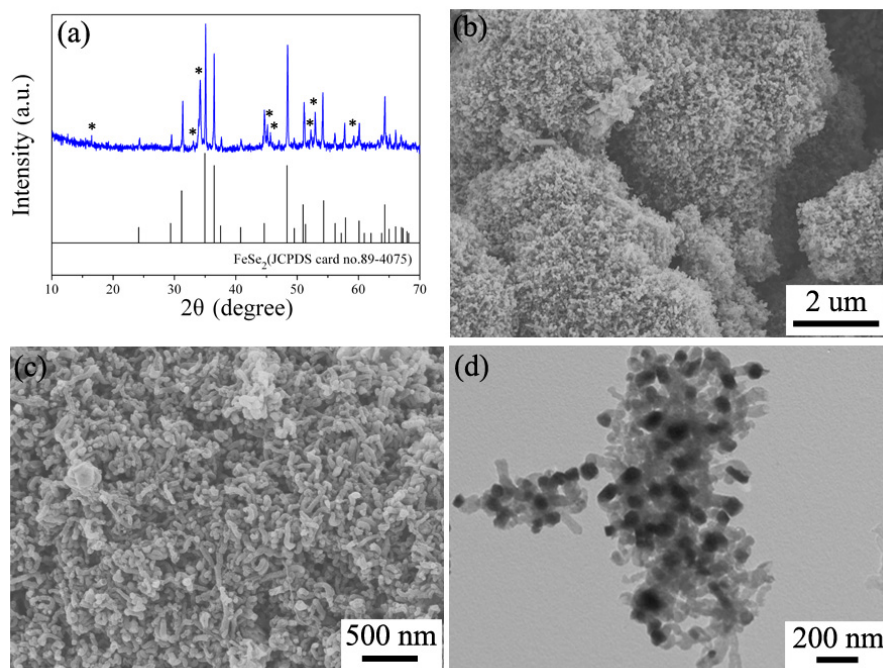

**Fig. S8.** (a) Powder XRD pattern for the FeSe<sub>2</sub>/C hybrids (blue, top) and the standard pattern of FeSe<sub>2</sub> (JCPDS card no. 89-4075) (black, bottom). The peaks marked with (\*) are indexed to Fe<sub>3</sub>Se<sub>4</sub> (JCPDS card no. 71-2251), (b) low-magnified, (c) high-magnified SEM images, and (d) TEM image for the as-prepared FeSe<sub>2</sub>/C hybrids.

### Supplementary references

- S1. J. Wang, Q. Yang and Z. Zhang, *J. Phys. Chem. Lett.*, 2009, **1**, 102–106.  
 S2. S. Boyanov, D. Zitoun, M. Ménétrier, J. C. Jumas, M. Womes and L. Monconduit, *J. Phys. Chem. C*, 2009, **113**, 21441–21452.  
 S3. M. A. Lukowski, A. S. Daniel, F. Meng, A. Forticaux, L. Li and S. Jin, *J. Am. Chem. Soc.*, 2013, **135**, 10274–10277.  
 S4. D. Chen, Q. Tao, L. W. Liao, S. X. Liu, Y. X. Chen and S. Ye, *Electrocatalysis*, 2011, **2**, 207–219.  
 S5. G. Kresse, and J. Furthmüller, *Phys. Rev. B*, 1996, **54**, 11169–11186.  
 S6. G. Kresse and J. Hafner, *Phys. Rev. B*, 1993, **48**, 13115–13118.  
 S7. G. Kresse and J. Furthmüller, *Comput. Mater. Sci.*, 1996, **6**, 15–50.  
 S8. J. P. Perdew, K. Burke and M. Ernzerhof, *Phys. Rev. Lett.*, 1996, **77**, 3865–3868.



- S9. P. E. Blöchl, *Phys. Rev. B*, 1994, **50**, 17953–17979.
- S10. G. Kresse and D. Joubert, *Phys. Rev. B*, 1999, **59**, 1758–1775.
- S11. P. Xiao, M. A. Sk, L. Thia, X. Ge, R. J. Lim, J. Y. Wang, K. H. Lim and X. Wang, *Energy Environ. Sci.*, 2014, **7**, 2624–2629.
- S12. B. Hinnemann, P. G. Moses, J. Bonde, K. P. Jørgensen, J. H. Nielsen, S. Horch, I. Chorkendorff and J. K. Nørskov, *J. Am. Chem. Soc.*, 2005, **127**, 5308–5309.
- S13. P. W. Atkins, *Physical Chemistry*, Oxford University Press, Oxford, 1998.
